# Supplementary material
Source: publisher site journal article supplement (https://www.dovepress.com/article/246528)
Supplement: Supplementary file 1 [file get_supplementary_file.php]

| **Supplementary Table 1. Information about sites and principal investigators** |
| --- |
| 1. Metro Health Hospital, Wyoming, MI (Jihad Mustapha, Larry Diaz) |
| 2. Coastal Vascular and Interventional, Pensacola, FL (Huey McDaniel) |
| 3. Mid-Michigan Heart and Vascular Center, P.C., Mt. Pleasant, MI (John McClure) |
| 4. Rex Hospital, Raleigh, NC (George Adams) |
| 5. St. Luke's Medical Center, Phoenix, AZ (Mansour Assar) |
| 6. Gotham Cardiovascular Research, PC, New York, NY (Cezar Staniloae) |
| 7. Mission Research Institute, New Braunfels, TX (Jason Yoho, Jamison Wyatt) |
| 8. Arkansas Heart Hospital Clinic, Little Rock, AR (Ian Cawich) |
| 9. El Paso Cardiology Associates, El Paso, TX (Mohammad Raja) |
| 10. Mercy Gilbert Medical Center, Chandler, AZ (Georges Nseir) |
| 11. First Coast Cardiovascular Institute, Jacksonville, FL (Issam Moussa, Vaqar Ali) |
| 12. St. John Hospital and Medical Center, Detroit, MI (Thomas Davis) |
| 13. Duke University Hospital, Lumberton, NC (Schuyler Jones) |
| 14. Houston Methodist Sugar Land Hospital, Sugar Land, TX (Imran Mohiuddin) |
| 15. KentuckyOne Health, Lexington, KY (Kiran Saraff) |
| 16. Premier Surgical Associates, Knoxville, TN (George Pliagas) |
| 17. San Antonio Endovascular & Heart Institute, San Antonio, TX (Stefan Kiesz) |
| 18. Midwest Cardiovascular Research Foundation, Davenport, IA (Nicolas Shammas) |
| 19. Riverside Methodist Hospital/Ohio Health, Columbus, OH (John Phillips) |
| 20. Cardiovascular Associates of East Texas, Tyler, TX (Jeffrey Carr) |
| 21. Memorial Hospital of Carbondale, Carbondale, IL (Raed Al-Dallow) |
| 22. Colorado Heart and Vascular, Lakewood, CO (Sameer K Mehta, John Altman)* |
| 23. University Surgical Associates, Chattanooga, TN (Mark Fugate, Christopher LeSar) |
| 24. Columbia University Medical Center, New York, NY (William Gray, Philip Green) |
| 25. VA Eastern Colorado Health Care System-Denver VAMC, Denver, CO (Ehrin Armstrong) |
| 26. Michigan Outpatient Vascular Institute, Dearborn, MI (Elias Kassab) |
| 27. Cardiothoracic and Vascular Surgeons/CTVS, Austin, TX (Mazin Foteh) |
| 28. Shady Grove Adventist Hospital, Rockville, MD (Jeffrey Wang) |
| 29. Lester E. Cox Medical Centers, Springfield, MO (Robert Vorhies) |
| 30. Baptist Memorial Hospital DeSoto, Southhaven, MS (Stevan Himmelstein, Gilbert Zoghbi) |
| 31. Wellmont CVA Heart Institute, Kingsport, TN (Chris Metzger) |
| 32. Clearwater Cardiovascular & Interventional Consultants, Clearwater, FL (Richard Sola, Saihari Sadanandan) |
| 33. Baptist Cardiac and Vascular Institute, Miami, FL (Ripal Gandhi) |
| 34. Providence Health Center, Waco, TX (M. Wayne Falcone, Adam Falcone) |
| 35. The Heart Institute at Largo, Largo, FL (Jesse Klein) |
| 36. Hartford Hospital, Hartford, CT (Immad Sadiq) |
| 37. Yale-New Haven Hospital, New Haven, CT (Jeffrey Indes, Timur Sarac) |
| 38. Saint Luke's Hospital, Kansas City, MO (Steven Laster) |
| 39. Sanford Research, Sioux Falls, SD (Patrick Kelly) |
| 40. Mount Sinai Medical Center Heart Institute Miami, Miami Beach, FL (Robert Beasley) |
| 41. Radiology and Imaging Specialists of Lakeland, P.A., Lakeland, FL (Lawrence Whitney) |
| 42. University of Texas Medical Branch at Galveston, Galveston, TX (Michael Silva) |
| 43. Florida Hospital Tampa, Pepin Heart Institute, Tampa, FL (Asad Sawar) |
| 44. Florida Hospital, Orlando, FL (Mark Ranson) |
| 45. St. John’s Hospital Springfield, Springfield, IL (Jeffrey Goldstein) |
| 46. Metropolitan Heart Institute, Coon Rapids, MN (Daniel Dulas) |
| 47. Houston Methodist Hospital Research Institute, Houston, TX (Alpesh Shah) |
| 48. St. John Health System, Tulsa, OK (Thomachan Kalapura) |
| 49. Chicago Vascular Clinic, Schaumburg, IL (Parag Doshi) |
| 50. Phoenix Heart Cardiovascular Lab, Glendale, AZ (Rajul Patel) |
| 51. Cedars-Sinai Heart Institute, Los Angeles, CA (Guy Mayeda) |
| *Follow-up visits for some subjects enrolled at this site performed at HealthONE Clinic Services - Cardiovascular, LLC, Denver, CO (Sameer K. Mehta). |

| Supplementary Table 2. ABI and Rutherford classification during follow up | | | |
| --- | --- | --- | --- |
|  | Male | Female | P-value |
| Median [IQR] ABI at baseline | 0.85 [0.64, 1.07] (N=338) | 0.82 [0.57, 0.99] (N=217) | 0.005 |
| Median [IQR] Rutherford classification at baseline | 5.0 [4.0, 5.0] (N=437) | 5.0 [4.0, 5.0] (N=252) | 0.004 |
| Number of patients with Rutherford class 4/5/6 at baseline | 165/199/73 | 120/105/27 | 0.013/0.340/0.033 |
| Categorical ABI (target limb) at baseline | N=393 | N=231 | <.0001 |
| Abnormal ABI (≤0.90) at baseline | 189 (48.1%) | 137 (59.3%) | 0.008 |
| Borderline ABI (>0.90 and <1.00) at baseline | 30 (7.6%) | 27 (11.7%) | 0.113 |
| Normal ABI (≥1.00 and ≤1.40) at baseline | 95 (24.2%) | 49 (21.2%) | 0.432 |
| Non compressible (>1.40 or non-compressible) at baseline | 79 (20.1%) | 18 (7.8%) | <.0001 |
| Median [IQR] ABI at 30 days | 1.00 [0.83, 1.15] (N=308) | 0.94 [0.76, 1.05] (N=192) | 0.001 |
| Median [IQR] Rutherford classification at 30 days | 4.0 [1.0, 5.0] (N=384) | 4.0 [2.0, 5.0] (N=216) | 0.245 |
| Number of patients with Rutherford class 4/5/6 at 30 days | 41/134/54 | 39/65/19 | 0.012/0.241/0.068 |
| Categorical ABI (target limb) at 30 days | N=351 | N=200 | <.0001 |
| Abnormal ABI (≤0.90) at 30 days | 112 (31.9%) | 84 (42.0%) | 0.021 |
| Borderline ABI (>0.90 and <1.00) at 30 days | 33 (9.4%) | 36 (18.0%) | 0.005 |
| Normal ABI (≥1.00 and ≤1.40) at 30 days | 141 (40.2%) | 68 (34.0%) | 0.171 |
| Non compressible (>1.40 or non-compressible) at 30 days | 65 (18.5%) | 12 (6.0%) | <.0001 |
| Median [IQR] ABI at 1 year | 0.98 [0.77, 1.15] (N=210) | 0.94 [0.71, 1.07] (N=140) | 0.021 |
| Median [IQR] Rutherford classification at 1 year | 1.0 [0.0, 4.0] (N=264) | 2.0 [0.0, 4.0] (N=158) | 0.189 |
| Number of patients with Rutherford class 4/5/6 at 1 year | 18/38/14 | 21/31/4 | 0.036/0.175/0.218 |
| Categorical ABI (target limb) at 1 year | N=240 | N=150 | 0.132 |
| Abnormal ABI (≤0.90) at 1 year | 84 (35.0%) | 64 (42.7%) | 0.135 |
| Borderline ABI (>0.90 and <1.00) at 1 year | 33 (13.8%) | 23 (15.3%) | 0.659 |
| Normal ABI (≥1.00 and ≤1.40) at 1 year | 78 (32.5%) | 47 (31.3%) | 0.825 |
| Non compressible (>1.40 or non-compressible) at 1 year | 45 (18.8%) | 16 (10.7%) | 0.033 |
| Median [IQR] ABI at 2 years | 0.98 [0.83, 1.12] (N=159) | 0.94 [0.78, 1.03] (N=107) | 0.006 |
| Median [IQR] Rutherford classification at 2 years | 1.0 [0.0, 3.0] (N=202) | 2.0 [0.0, 4.0] (N=126) | 0.052 |
| Number of patients with Rutherford class 4/5/6 at 2 years | 14/22/11 | 9/20/6 | 1.000/0.234/1.000 |
| Categorical ABI (target limb) at 2 years | N=181 | N=114 | 0.022 |
| Abnormal ABI (≤0.90) at 2 years | 55 (30.4%) | 47 (41.2%) | 0.061 |
| Borderline ABI (>0.90 and <1.00) at 2 years | 27 (14.9%) | 25 (21.9%) | 0.158 |
| Normal ABI (≥1.00 and ≤1.40) at 2 years | 68 (37.6%) | 32 (28.1%) | 0.102 |
| Non compressible (>1.40 or non-compressible) at 2 years | 31 (17.1%) | 10 (8.8%) | 0.056 |
| *ABI: ankle branchial index, IQR: interquartile range | | |  |

|  | | | | | | | | | |
| --- | --- | --- | --- | --- | --- | --- | --- | --- | --- |
|  | | | | |  | |  | |  | |
| Supplementary Table 3. Causes of in-hospital death | | | |  | |  | |
| Patient | Group | Age | Significant medical history | Cause of death | | Time interval between EVT and event | |
| case 1 | Female | 55 | Chronic renal disease | cardiac arrest due to hyperkalemia from renal failure; arrhythmia | | 3 days | |
| case 2 | Female | 91 | Preexisting wounds on index limb toes | toes became necrotic requiring amputation; cardiac arrest | | 6 days | |
| case 3 | Female | 58 | Chronic renal disease; hemodialysis; HTN; DM | digital gangrene; non-healing foot ulcer; sepsis; below knee amputation; cardiopulmonary arrest | | 11 days | |
| *EVT: endovascular therapy, HTN: hypertension, DM: diabetes | | | | | | | |

| Supplementary Table 4. Odds ratio of short-term outcomes and angiographic complications (males vs females) | | | |  |
| --- | --- | --- | --- | --- |
| Outcomes | | OR 95% CI | P-value |  |
| Per patient | |  |  |  |
| Procedural success (<50% stenosis, without significant angiographic complications) | | 0.87 [0.60, 1.26] | 0.449 |  |
| Severe angiographic complications | | 0.97 [0.60, 1.56] | 0.891 |  |
| Per lesion | |  |  |  |
| Lesion success (<50% stenosis, without significant angiographic complications) | | 0.96 [0.69, 1.35] | 0.830 |  |
| Severe angiographic complications | | 0.82 [0.53, 1.26] | 0.367 |  |
| Severe Dissection (Type C-F) | | 2.66 [0.90, 7.88] | 0.078 |  |
| Perforation | | 0.82 [0.29, 2.33] | 0.709 |  |
| Distal Embolization | | 0.53 [0.30, 0.95] | 0.033 |  |
| Abrupt closure | | 7.84 [1.03, 59.83] | 0.047 |  |
|  |
| *OR: odds ratio; CI: confidence intervals | |  |  |  |

| Supplementary Table 5. Kaplan-Meier estimates for late outcomes | | | |
| --- | --- | --- | --- |
| Outcomes | Male (N=437) | Female (N=252) | P-value (log-rank test) |
| Freedom from major amputation or death | | | |
| 1 month | 97.7% | 97.6% | 0.928 |
| 6 months | 88.9% | 92.1% | 0.197 |
| 12 months | 83.7% | 87.5% | 0.174 |
| 18 months | 79.2% | 86.0% | 0.041 |
| 24 months | 75.8% | 82.3% | 0.059 |
| 30 months | 73.1% | 80.0% | 0.054 |
| 36 months | 70.0% | 74.9% | 0.132 |
| Freedom from all-cause death | | | |
| 1 month | 99.3% | 98.8% | 0.487 |
| 6 months | 93.2% | 95.0% | 0.378 |
| 12 months | 89.5% | 90.9% | 0.546 |
| 18 months | 85.4% | 89.4% | 0.190 |
| 24 months | 82.3% | 86.8% | 0.176 |
| 30 months | 79.3% | 83.9% | 0.177 |
| 36 months | 76.1% | 79.9% | 0.259 |
| Freedom from major amputation | | | |
| 1 month | 98.2% | 98.8% | 0.529 |
| 6 months | 94.7% | 97.0% | 0.156 |
| 12 months | 92.8% | 96.5% | 0.052 |
| 18 months | 91.8% | 96.5% | 0.025 |
| 24 months | 91.1% | 95.3% | 0.047 |
| 30 months | 91.1% | 95.3% | 0.047 |
| 36 months | 91.1% | 93.9% | 0.115 |
| Freedom from MAE | | | |
| 1 month | 94.9% | 96.4% | 0.388 |
| 6 months | 80.3% | 83.3% | 0.297 |
| 12 months | 70.3% | 73.1% | 0.449 |
| 18 months | 65.4% | 67.5% | 0.536 |
| 24 months | 61.6% | 66.3% | 0.326 |
| 30 months | 59.1% | 64.9% | 0.256 |
| 36 months | 57.7% | 64.2% | 0.223 |
| Freedom from TVR/TLR | | | |
| 1 month | 96.8% | 98.8% | 0.107 |
| 6 months | 83.7% | 86.4% | 0.292 |
| 12 months | 74.6% | 76.1% | 0.627 |
| 18 months | 69.9% | 70.5% | 0.769 |
| 24 months | 66.4% | 69.3% | 0.527 |
| 30 months | 63.8% | 67.2% | 0.479 |
| 36 months | 62.4% | 66.5% | 0.426 |
| *MAE: major adverse event, TVR: target vessel revascularization, TLR: target lesion revascularization, N: number of patients | | | |
